# Supplementary material for: LASSO Regression-Based Diagnosis of Acute ST-Segment Elevation Myocardial Infarction (STEMI) on Electrocardiogram (ECG)
Source: MDPI journal article supplement (doi:10.3390/jcm11185408), 2022-09-15
Supplement: s1 [file s1]

**Supplementary Tabel S1 The interpretation of ECG features**

| Abbreviation       | Interpretation                                     |
|--------------------|----------------------------------------------------|
| CVD family history | cardiovascular disease family history              |
| WBC                | white blood cell count                             |
| RBC                | red blood cell count                               |
| HGB                | hemoglobin concentration                           |
| PLT                | platelet count                                     |
| ALB                | albumin                                            |
| GLB                | globulin                                           |
| K                  | potassium                                          |
| Na                 | sodium                                             |
| Ca                 | calcium                                            |
| GLU                | fasting blood glucose                              |
| BUN                | blood urea nitrogen                                |
| CREAT              | Serum creatinine                                   |
| CHOL               | total cholesterol                                  |
| TG                 | triglyceride                                       |
| HDL-C              | high density lipoprotein cholesterol               |
| LDL-C              | low density lipoprotein cholesterol                |
| CK-MB              | creatine kinase-MB                                 |
| Minimum HR         | minimum heart rate                                 |
| Maximun HR         | maximum heart rate                                 |
| Average HR         | average heart rate                                 |
| PR                 | PR interval                                        |
| P wave             | P wave duration                                    |
| QRS complex        | QRS complex duration                               |
| T wave             | T wave duration                                    |
| QT interval        | QT interval                                        |
| QTc interval       | QTc interval                                       |
| QRS axis           | QRS axis                                           |
| RV1+SV5            | R wave amplitude of V1 plus S wave amplitude of V5 |
| RV5+SV1            | R wave amplitude of V5 plus S wave amplitude of V1 |
| R-PB               | Peak R wave to the beginning of P wave             |
| R-P                | Peak R wave to peak P wave                         |
| R-PE               | Peak R wave to the ending of P wave                |
| R-Q                | Peak R wave to peak Q wave                         |
| R-S                | Peak R wave to peak S wave                         |
| R-TB               | Peak R wave to the beginning of T wave             |
| R-T                | Peak R wave to the peak of T wave                  |
| R-TE               | Peak R wave to the ending of T wave                |

|         |                                                      |
|---------|------------------------------------------------------|
| Q-P     | Peak Q wave to peak P wave                           |
| S-T     | Peak S wave to peak P wave                           |
| Q-PB    | Peak Q wave to the beginning of P wave               |
| S-TE    | Peak S wave to the ending of T wave                  |
| I (PB)  | the amplitude of the beginning of P wave in Lead I   |
| II(PB)  | the amplitude of the beginning of P wave in Lead II  |
| III(PB) | the amplitude of the beginning of P wave in Lead III |
| aVR(PB) | the amplitude of the beginning of P wave in Lead aVR |
| aVL(PB) | the amplitude of the beginning of P wave in Lead aVL |
| aVF(PB) | the amplitude of the beginning of P wave in Lead aVF |
| V1(PB)  | the amplitude of the beginning of P wave in Lead V1  |
| V2(PB)  | the amplitude of the beginning of P wave in Lead V2  |
| V3(PB)  | the amplitude of the beginning of P wave in Lead V3  |
| V4(PB)  | the amplitude of the beginning of P wave in Lead V4  |
| V5(PB)  | the amplitude of the beginning of P wave in Lead V5  |
| V6(PB)  | the amplitude of the beginning of P wave in Lead V6  |
| I (PE)  | the amplitude of the ending of P wave in Lead I      |
| II(PE)  | the amplitude of the ending of P wave in Lead II     |
| III(PE) | the amplitude of the ending of P wave in Lead III    |
| aVR(PE) | the amplitude of the ending of P wave in Lead aVR    |
| aVL(PE) | the amplitude of the ending of P wave in Lead aVL    |
| aVF(PE) | the amplitude of the ending of P wave in Lead aVF    |
| V1(PE)  | the amplitude of the ending of P wave in Lead V1     |
| V2(PE)  | the amplitude of the ending of P wave in Lead V2     |
| V3(PE)  | the amplitude of the ending of P wave in Lead V3     |
| V4(PE)  | the amplitude of the ending of P wave in Lead V4     |
| V5(PE)  | the amplitude of the ending of P wave in Lead V5     |
| V6(PE)  | the amplitude of the ending of P wave in Lead V6     |
| I (Q)   | the QRS complex amplitude in Lead I                  |
| II(Q)   | the QRS complex amplitude in Lead II                 |
| III(Q)  | the QRS complex amplitude in Lead III                |
| aVR(Q)  | the QRS complex amplitude in Lead aVR                |
| aVL(Q)  | the QRS complex amplitude in Lead aVL                |
| aVF(Q)  | the QRS complex amplitude in Lead aVF                |
| V1(Q)   | the QRS complex amplitude in Lead V1                 |
| V2(Q)   | the QRS complex amplitude in Lead V2                 |
| V3(Q)   | the QRS complex amplitude in Lead V3                 |
| V4(Q)   | the QRS complex amplitude in Lead V4                 |
| V5(Q)   | the QRS complex amplitude in Lead V5                 |
| V6(Q)   | the QRS complex amplitude in Lead V6                 |
| I (R)   | the QRS complex amplitude in Lead I                  |
| II(R)   | the QRS complex amplitude in Lead II                 |
| III(R)  | the QRS complex amplitude in Lead III                |
| aVR(R)  | the QRS complex amplitude in Lead aVR                |

|         |                                       |
|---------|---------------------------------------|
| aVL(R)  | the QRS complex amplitude in Lead aVL |
| aVF(R)  | the QRS complex amplitude in Lead aVF |
| V1(R)   | the QRS complex amplitude in Lead V1  |
| V2(R)   | the QRS complex amplitude in Lead V2  |
| V3(R)   | the QRS complex amplitude in Lead V3  |
| V4(R)   | the QRS complex amplitude in Lead V4  |
| V5(R)   | the QRS complex amplitude in Lead V5  |
| V6(R)   | the QRS complex amplitude in Lead V6  |
| I (S)   | the S wave amplitude in Lead I        |
| II(S)   | the S wave amplitude in Lead II       |
| III(S)  | the S wave amplitude in Lead III      |
| aVR(S)  | the S wave amplitude in Lead aVR      |
| aVL(S)  | the S wave amplitude in Lead aVL      |
| aVF(S)  | the S wave amplitude in Lead aVF      |
| V1(S)   | the S wave amplitude in Lead V1       |
| V2(S)   | the S wave amplitude in Lead V2       |
| V3(S)   | the S wave amplitude in Lead V3       |
| V4(S)   | the S wave amplitude in Lead V4       |
| V5(S)   | the S wave amplitude in Lead V5       |
| V6(S)   | the S wave amplitude in Lead V6       |
| I (R')  | the R' wave amplitude in Lead I       |
| II(R')  | the R' wave amplitude in Lead II      |
| III(R') | the R' wave amplitude in Lead III     |
| aVR(R') | the R' wave amplitude in Lead aVR     |
| aVL(R') | the R' wave amplitude in Lead aVL     |
| aVF(R') | the R' wave amplitude in Lead aVF     |
| V1(R')  | the R' wave amplitude in Lead V1      |
| V2(R')  | the R' wave amplitude in Lead V2      |
| V3(R')  | the R' wave amplitude in Lead V3      |
| V4(R')  | the R' wave amplitude in Lead V4      |
| V5(R')  | the R' wave amplitude in Lead V5      |
| V6(R')  | the R' wave amplitude in Lead V6      |
| I (S')  | the S' wave amplitude in Lead I       |
| II(S')  | the S' wave amplitude in Lead II      |
| III(S') | the S' wave amplitude in Lead III     |
| aVR(S') | the S' wave amplitude in Lead aVR     |
| aVL(S') | the S' wave amplitude in Lead aVL     |
| aVF(S') | the S' wave amplitude in Lead aVF     |
| V1(S')  | the S' wave amplitude in Lead V1      |
| V2(S')  | the S' wave amplitude in Lead V2      |
| V3(S')  | the S' wave amplitude in Lead V3      |
| V4(S')  | the S' wave amplitude in Lead V4      |
| V5(S')  | the S' wave amplitude in Lead V5      |
| V6(S')  | the S' wave amplitude in Lead V6      |

|           |                                                               |
|-----------|---------------------------------------------------------------|
| I (TB)    | the amplitude of the beginning of T wave in Lead I            |
| II(TB)    | the amplitude of the beginning of T wave in Lead II           |
| III(TB)   | the amplitude of the beginning of T wave in Lead III          |
| aVR(TB)   | the amplitude of the beginning of T wave in Lead aVR          |
| aVL(TB)   | the amplitude of the beginning of T wave in Lead aVL          |
| aVF(TB)   | the amplitude of the beginning of T wave in Lead aVF          |
| V1(TB)    | the amplitude of the beginning of T wave in Lead V1           |
| V2(TB)    | the amplitude of the beginning of T wave in Lead V2           |
| V3(TB)    | the amplitude of the beginning of T wave in Lead V3           |
| V4(TB)    | the amplitude of the beginning of T wave in Lead V4           |
| V5(TB)    | the amplitude of the beginning of T wave in Lead V5           |
| V6(TB)    | the amplitude of the beginning of T wave in Lead V6           |
| I (TE)    | the amplitude of the end of T wave in Lead I                  |
| II(TE)    | the amplitude of the end of T wave in Lead II                 |
| III(TE)   | the amplitude of the end of T wave in Lead III                |
| aVR(TE)   | the amplitude of the end of T wave in Lead aVR                |
| aVL(TE)   | the amplitude of the end of T wave in Lead aVL                |
| aVF(TE)   | the amplitude of the end of T wave in Lead aVF                |
| V1(TE)    | the amplitude of the end of T wave in Lead V1                 |
| V2(TE)    | the amplitude of the end of T wave in Lead V2                 |
| V3(TE)    | the amplitude of the end of T wave in Lead V3                 |
| V4(TE)    | the amplitude of the end of T wave in Lead V4                 |
| V5(TE)    | the amplitude of the end of T wave in Lead V5                 |
| V6(TE)    | the amplitude of the end of T wave in Lead V6                 |
| I (ST20)  | the amplitude of ST segment at 20 ms from J point in Lead I   |
| II(ST20)  | the amplitude of ST segment at 20 ms from J point in Lead II  |
| III(ST20) | the amplitude of ST segment at 20 ms from J point in Lead III |
| aVR(ST20) | the amplitude of ST segment at 20 ms from J point in Lead aVR |
| aVL(ST20) | the amplitude of ST segment at 20 ms from J point in Lead aVL |
| aVF(ST20) | the amplitude of ST segment at 20 ms from J point in Lead aVF |
| V1(ST20)  | the amplitude of ST segment at 20 ms from J point in Lead V1  |
| V2(ST20)  | the amplitude of ST segment at 20 ms from J point in Lead V2  |
| V3(ST20)  | the amplitude of ST segment at 20 ms from J point in Lead V3  |
| V4(ST20)  | the amplitude of ST segment at 20 ms from J point in Lead V4  |
| V5(ST20)  | the amplitude of ST segment at 20 ms from J point in Lead V5  |
| V6(ST20)  | the amplitude of ST segment at 20 ms from J point in Lead V6  |
| I (ST40)  | the amplitude of ST segment at 40 ms from J point in Lead I   |
| II(ST40)  | the amplitude of ST segment at 40 ms from J point in Lead II  |
| III(ST40) | the amplitude of ST segment at 40 ms from J point in Lead III |
| aVR(ST40) | the amplitude of ST segment at 40 ms from J point in Lead aVR |
| aVL(ST40) | the amplitude of ST segment at 40 ms from J point in Lead aVL |
| aVF(ST40) | the amplitude of ST segment at 40 ms from J point in Lead aVF |
| V1(ST40)  | the amplitude of ST segment at 40 ms from J point in Lead V1  |
| V2(ST40)  | the amplitude of ST segment at 40 ms from J point in Lead V2  |

|           |                                                               |
|-----------|---------------------------------------------------------------|
| V3(ST40)  | the amplitude of ST segment at 40 ms from J point in Lead V3  |
| V4(ST40)  | the amplitude of ST segment at 40 ms from J point in Lead V4  |
| V5(ST40)  | the amplitude of ST segment at 40 ms from J point in Lead V5  |
| V6(ST40)  | the amplitude of ST segment at 40 ms from J point in Lead V6  |
| I (ST60)  | the amplitude of ST segment at 60 ms from J point in Lead I   |
| II(ST60)  | the amplitude of ST segment at 60 ms from J point in Lead II  |
| III(ST60) | the amplitude of ST segment at 60 ms from J point in Lead III |
| aVR(ST60) | the amplitude of ST segment at 60 ms from J point in Lead aVR |
| aVL(ST60) | the amplitude of ST segment at 60 ms from J point in Lead aVL |
| aVF(ST60) | the amplitude of ST segment at 60 ms from J point in Lead aVF |
| V1(ST60)  | the amplitude of ST segment at 60 ms from J point in Lead V1  |
| V2(ST60)  | the amplitude of ST segment at 60 ms from J point in Lead V2  |
| V3(ST60)  | the amplitude of ST segment at 60 ms from J point in Lead V3  |
| V4(ST60)  | the amplitude of ST segment at 60 ms from J point in Lead V4  |
| V5(ST60)  | the amplitude of ST segment at 60 ms from J point in Lead V5  |
| V6(ST60)  | the amplitude of ST segment at 60 ms from J point in Lead V6  |
| I (ST80)  | the amplitude of ST segment at 80 ms from J point in Lead I   |
| II(ST80)  | the amplitude of ST segment at 80 ms from J point in Lead II  |
| III(ST80) | the amplitude of ST segment at 80 ms from J point in Lead III |
| aVR(ST80) | the amplitude of ST segment at 80 ms from J point in Lead aVR |
| aVL(ST80) | the amplitude of ST segment at 80 ms from J point in Lead aVL |
| aVF(ST80) | the amplitude of ST segment at 80 ms from J point in Lead aVF |
| V1(ST80)  | the amplitude of ST segment at 80 ms from J point in Lead V1  |
| V2(ST80)  | the amplitude of ST segment at 80 ms from J point in Lead V2  |
| V3(ST80)  | the amplitude of ST segment at 80 ms from J point in Lead V3  |
| V4(ST80)  | the amplitude of ST segment at 80 ms from J point in Lead V4  |
| V5(ST80)  | the amplitude of ST segment at 80 ms from J point in Lead V5  |
| V6(ST80)  | the amplitude of ST segment at 80 ms from J point in Lead V6  |

---

**Supplementary Table S2 Baseline characteristics between patients with or without STEMI**

|                          | Ctrl         | STEMI        | P value |
|--------------------------|--------------|--------------|---------|
| n                        | 502          | 318          |         |
| Age(years)               | 55.1±12.4    | 60.6±12.8    | 0.000   |
| Gender(female)           | 224(44.6%)   | 58(18.2%)    | 0.000   |
| Diabetes mellitus        | 98(19.5%)    | 58(18.2%)    | 0.715   |
| Hypertension             | 224(44.6%)   | 113(35.5%)   | 0.011   |
| Chronic kidney disease   | 12(2.4%)     | 7(2.2%)      | 0.532   |
| CVD family history       | 23(4.6%)     | 20(6.3%)     | 0.302   |
| WBC(*10 <sup>9</sup> /L) | 7.28±3.00    | 9.15±3.13    | 0.881   |
| RBC(*10 <sup>9</sup> /L) | 4.27±0.95    | 4.38±0.69    | 0.039   |
| HGB(g/ml)                | 128.09±16.83 | 131.49±19.69 | 0.013   |
| PLT(*10 <sup>9</sup> /L) | 207.26±59.49 | 216.83±60.41 | 0.007   |
| ALB(g/L)                 | 39.36±4.33   | 38.71±4.67   | 0.028   |
| GLB(g/L)                 | 24.65±3.85   | 25.19±4.91   | 0.061   |
| K(mmol/L)                | 3.57±0.40    | 3.73±0.49    | 0.000   |
| Na(mmol/L)               | 137.4±4.6    | 137.9±4.5    | 0.014   |
| Ca(mmol/L)               | 2.16±0.31    | 2.14±1.25    | 0.697   |
| GLU(mmol/L)              | 6.69±2.99    | 7.27±2.98    | 0.020   |
| BUN(mmol/L)              | 5.1±2.7      | 5.8±2.9      | 0.001   |
| CREAT(mmol/L)            | 82.07±58.45  | 76.08±42.21  | 0.199   |
| CHOL(mmol/L)             | 4.52±1.22    | 4.50±1.18    | 0.860   |
| TG(mmol/L)               | 1.59±1.08    | 1.64±1.14    | 0.461   |
| HDL(mmol/L)              | 1.12±0.32    | 1.01±0.30    | 0.000   |
| LDL(mmol/L)              | 2.80±1.00    | 2.93±1.01    | 0.042   |
| CK-MB(U/L)               | 6.49±4.71    | 32.52±58.25  | 0.000   |

**Supplementary Table S3 ECG features between control and STEMI**

|                  | Ctrl         | STEMI        | P value |
|------------------|--------------|--------------|---------|
| n                | 502          | 318          |         |
| Maxmum HR        | 69.37±12.62  | 71.74±17.17  | 0.034   |
| Minimun HR       | 78.66±20.03  | 86.79±25.49  | 0.000   |
| Average HR       | 73.17±12.52  | 78.28±17.48  | 0.000   |
| PR(ms)           | 151.71±24.46 | 153.04±34.42 | 0.548   |
| P wave(ms)       | 108.8±21.88  | 103.8±26.14  | 0.005   |
| QRS complex(ms)  | 102.72±10.69 | 105.62±13.86 | 0.002   |
| T wave(ms)       | 183.61±21.69 | 176.21±34.65 | 0.001   |
| QT interval(ms)  | 386.24±32.41 | 394.61±43.89 | 0.004   |
| QTc interval(ms) | 423.81±26.27 | 445.64±35.58 | 0.000   |
| QRS axis         | 43.23±38.11  | 29.72±66.89  | 0.001   |
| RV1+SV5 mv       | 0.57±0.33    | 0.49±0.38    | 0.001   |
| RV5+SV1 mv       | 2.31±0.71    | 1.75±0.89    | 0.000   |
| R-PB(ms)         | 199.7±31.2   | 199.19±45.24 | 0.861   |
| R-P(ms)          | 136.46±24.42 | 145.17±39.51 | 0.000   |
| R-PE(ms)         | 91.59±15.22  | 96.62±27.51  | 0.003   |
| R-Q(ms)          | 49.39±3.98   | 49.54±4.61   | 0.629   |
| R-S(ms)          | 53.33±7.79   | 56.08±11.62  | 0.000   |
| R-TB(ms)         | 153.24±23.11 | 168.85±32.54 | 0.000   |
| R-T(ms)          | 264.23±39.58 | 267.8±40.34  | 0.214   |
| R-TE(ms)         | 336.85±32.04 | 345.06±44.14 | 0.004   |
| Q-P(ms)          | 88.42±20.14  | 101.06±29.55 | 0.000   |
| S-T(ms)          | 210.9±39.82  | 211.72±41.91 | 0.781   |
| Q-PB(ms)         | 151.81±24.34 | 155.7±27.15  | 0.038   |
| S-TE(ms)         | 283.52±32.77 | 288.98±46.03 | 0.066   |
| I (PB)(mV)       | 0.06±0.03    | 0.06±0.03    | 0.054   |
| II(PB)mV         | 0.11±0.04    | 0.1±0.05     | 0.034   |
| III(PB)mV        | 0.07±0.04    | 0.06±0.04    | 0.004   |
| aVR(PB)mV        | 0±0          | 0±0          | 0.147   |
| aVL(PB)mV        | 0.02±0.02    | 0.03±0.03    | 0.028   |
| aVF(PB)mV        | 0.08±0.04    | 0.08±0.04    | 0.018   |
| V1(PB)mV         | 0.04±0.03    | 0.03±0.03    | 0.002   |
| V2(PB)mV         | 0.06±0.03    | 0.05±0.04    | 0.000   |
| V3(PB)mV         | 0.06±0.03    | 0.05±0.03    | 0.000   |
| V4(PB)mV         | 0.06±0.02    | 0.05±0.03    | 0.000   |
| V5(PB)mV         | 0.06±0.02    | 0.05±0.03    | 0.000   |
| V6(PB)mV         | 0.06±0.02    | 0.05±0.03    | 0.055   |
| I (PE)mV         | 0±0          | 0±0.01       | 0.046   |
| II(PE)mV         | 0±0          | 0±0.01       | 0.252   |
| III(PE)mV        | -0.01±0.02   | -0.01±0.02   | 0.078   |

|           |            |            |       |
|-----------|------------|------------|-------|
| aVR(PE)mV | -0.08±0.03 | -0.07±0.03 | 0.338 |
| aVL(PE)mV | -0.02±0.02 | -0.02±0.02 | 0.014 |
| aVF(PE)mV | 0±0.01     | 0±0.01     | 0.232 |
| V1(PE)mV  | -0.03±0.03 | -0.04±0.03 | 0.000 |
| V2(PE)mV  | -0.01±0.02 | -0.01±0.02 | 0.000 |
| V3(PE)mV  | 0±0.01     | -0.01±0.02 | 0.000 |
| V4(PE)mV  | 0±0.01     | 0±0.01     | 0.000 |
| V5(PE)mV  | 0±0.01     | 0±0.01     | 0.020 |
| V6(PE)mV  | 0±0        | 0±0.01     | 0.337 |
| I (Q)mV   | -0.03±0.03 | -0.03±0.09 | 0.443 |
| II(Q)mV   | -0.03±0.04 | -0.09±0.12 | 0.000 |
| III(Q)mV  | -0.06±0.11 | -0.26±0.32 | 0.000 |
| aVR(Q)mV  | -0.38±0.34 | -0.26±0.28 | 0.000 |
| aVL(Q)mV  | -0.04±0.07 | -0.04±0.11 | 0.944 |
| aVF(Q)mV  | -0.03±0.06 | -0.15±0.19 | 0.000 |
| V1(Q)mV   | -0.04±0.2  | -0.35±0.49 | 0.000 |
| V2(Q)mV   | -0.01±0.13 | -0.51±0.85 | 0.000 |
| V3(Q)mV   | -0.01±0.14 | -0.4±0.71  | 0.000 |
| V4(Q)mV   | -0.01±0.06 | -0.16±0.36 | 0.000 |
| V5(Q)mV   | -0.02±0.04 | -0.08±0.17 | 0.000 |
| V6(Q)mV   | -0.03±0.04 | -0.05±0.08 | 0.000 |
| I (R)mV   | 0.61±0.28  | 0.54±0.32  | 0.003 |
| II(R)mV   | 0.77±0.32  | 0.42±0.3   | 0.000 |
| III(R)mV  | 0.37±0.33  | 0.26±0.27  | 0.000 |
| aVR(R)mV  | 0.07±0.08  | 0.08±0.1   | 0.168 |
| aVL(R)mV  | 0.33±0.25  | 0.42±0.31  | 0.000 |
| aVF(R)mV  | 0.52±0.33  | 0.29±0.27  | 0.000 |
| V1(R)mV   | 0.23±0.18  | 0.15±0.24  | 0.000 |
| V2(R)mV   | 0.66±0.35  | 0.46±0.58  | 0.000 |
| V3(R)mV   | 1.01±0.5   | 0.69±0.8   | 0.000 |
| V4(R)mV   | 1.52±0.61  | 0.96±0.92  | 0.000 |
| V5(R)mV   | 1.49±0.56  | 0.98±0.75  | 0.000 |
| V6(R)mV   | 1.2±0.45   | 0.81±0.56  | 0.000 |
| I (S)mV   | -0.1±0.11  | -0.1±0.13  | 0.682 |
| II(S)mV   | -0.09±0.13 | -0.09±0.14 | 0.866 |
| III(S)mV  | -0.17±0.24 | -0.13±0.24 | 0.007 |
| aVR(S)mV  | -0.29±0.39 | -0.19±0.27 | 0.000 |
| aVL(S)mV  | -0.15±0.16 | -0.12±0.16 | 0.016 |
| aVF(S)mV  | -0.1±0.15  | -0.08±0.15 | 0.158 |
| V1(S)mV   | -0.83±0.39 | -0.78±0.47 | 0.166 |
| V2(S)mV   | -1.23±0.6  | -0.85±0.8  | 0.000 |
| V3(S)mV   | -0.91±0.6  | -0.67±0.63 | 0.000 |
| V4(S)mV   | -0.61±0.47 | -0.52±0.45 | 0.006 |
| V5(S)mV   | -0.35±0.3  | -0.34±0.29 | 0.518 |



|           |            |            |       |
|-----------|------------|------------|-------|
| V6(S)mV   | -0.18±0.19 | -0.15±0.18 | 0.041 |
| I (R')mV  | 0±0        | 0±0.02     | 0.312 |
| II(R')mV  | 0±0.01     | 0.01±0.03  | 0.046 |
| III(R')mV | 0.05±0.11  | 0.02±0.06  | 0.000 |
| aVR(R')mV | 0.02±0.05  | 0.03±0.07  | 0.001 |
| aVL(R')mV | 0.01±0.02  | 0±0.02     | 0.037 |
| aVF(R')mV | 0.02±0.06  | 0.02±0.06  | 0.991 |
| V1(R')mV  | 0.02±0.13  | 0.01±0.06  | 0.077 |
| V2(R')mV  | 0±0.01     | 0±0.02     | 0.216 |
| V3(R')mV  | 0±0.03     | 0±0.05     | 0.682 |
| V4(R')mV  | 0±0.01     | 0.01±0.06  | 0.277 |
| V5(R')mV  | 0±0.01     | 0±0        | 0.059 |
| V6(R')mV  | 0±0        | 0±0.01     | 0.658 |
| I (S')mV  | 0±0        | 0±0        | 0.318 |
| II(S')mV  | 0±0        | 0±0.02     | 0.159 |
| III(S')mV | -0.01±0.04 | 0±0.03     | 0.150 |
| aVR(S')mV | 0±0        | 0±0        | 0.318 |
| aVL(S')mV | 0±0.01     | 0±0        | 0.336 |
| aVF(S')mV | 0±0.02     | -0.01±0.04 | 0.187 |
| V1(S')mV  | 0±0.02     | 0±0        | 0.037 |
| V2(S')mV  | 0±0.02     | -0.01±0.11 | 0.226 |
| V3(S')mV  | 0±0        | 0±0.05     | 0.272 |
| V4(S')mV  | 0±0.01     | -0.01±0.07 | 0.084 |
| V5(S')mV  | 0±0        | 0±0        | 0.000 |
| V6(S')mV  | 0±0        | 0±0.01     | 0.318 |
| I (TB)mV  | 0.13±0.07  | 0.08±0.08  | 0.000 |
| II(TB)mV  | 0.16±0.08  | 0.09±0.09  | 0.000 |
| III(TB)mV | 0.06±0.06  | 0.07±0.09  | 0.009 |
| aVR(TB)mV | 0±0.01     | 0.01±0.03  | 0.000 |
| aVL(TB)mV | 0.06±0.06  | 0.08±0.09  | 0.011 |
| aVF(TB)mV | 0.1±0.07   | 0.08±0.09  | 0.000 |
| V1(TB)mV  | 0.06±0.09  | 0.08±0.1   | 0.001 |
| V2(TB)mV  | 0.33±0.21  | 0.29±0.27  | 0.058 |
| V3(TB)mV  | 0.32±0.21  | 0.23±0.25  | 0.000 |
| V4(TB)mV  | 0.31±0.2   | 0.15±0.19  | 0.000 |
| V5(TB)mV  | 0.26±0.15  | 0.1±0.12   | 0.000 |
| V6(TB)mV  | 0.2±0.11   | 0.08±0.1   | 0.000 |
| I (TE)mV  | 0.13±0.07  | 0.08±0.08  | 0.000 |
| II(TE)mV  | 0.16±0.08  | 0.09±0.09  | 0.000 |
| III(TE)mV | 0.06±0.06  | 0.07±0.09  | 0.009 |
| aVR(TE)mV | 0±0.01     | 0.01±0.03  | 0.000 |
| aVL(TE)mV | 0.06±0.06  | 0.08±0.09  | 0.011 |
| aVF(TE)mV | 0.1±0.07   | 0.08±0.09  | 0.000 |
| V1(TE)mV  | 0.06±0.09  | 0.08±0.1   | 0.001 |

|             |            |            |       |
|-------------|------------|------------|-------|
| V2(TE)mV    | 0.33±0.21  | 0.29±0.27  | 0.058 |
| V3(TE)mV    | 0.32±0.21  | 0.23±0.25  | 0.000 |
| V4(TE)mV    | 0.31±0.2   | 0.15±0.19  | 0.000 |
| V5(TE)mV    | 0.26±0.15  | 0.1±0.12   | 0.000 |
| V6(TE)mV    | 0.2±0.11   | 0.08±0.1   | 0.000 |
| I (ST20)mV  | 0±0.02     | -0.01±0.05 | 0.000 |
| II(ST20)mV  | 0.01±0.03  | 0.03±0.08  | 0.000 |
| III(ST20)mV | 0±0.02     | 0.04±0.11  | 0.000 |
| aVR(ST20)mV | 0±0.02     | -0.01±0.04 | 0.146 |
| aVL(ST20)mV | 0±0.01     | -0.02±0.07 | 0.000 |
| aVF(ST20)mV | 0±0.02     | 0.03±0.09  | 0.000 |
| V1(ST20)mV  | 0.04±0.04  | 0.05±0.09  | 0.039 |
| V2(ST20)mV  | 0.09±0.07  | 0.11±0.16  | 0.016 |
| V3(ST20)mV  | 0.06±0.06  | 0.08±0.16  | 0.008 |
| V4(ST20)mV  | 0.02±0.05  | 0.04±0.13  | 0.089 |
| V5(ST20)mV  | 0±0.04     | 0.01±0.09  | 0.390 |
| V6(ST20)mV  | 0±0.03     | 0±0.06     | 0.482 |
| I (ST40)mV  | 0.01±0.02  | -0.01±0.05 | 0.000 |
| II(ST40)mV  | 0.01±0.03  | 0.03±0.08  | 0.000 |
| III(ST40)mV | 0±0.02     | 0.04±0.11  | 0.000 |
| aVR(ST40)mV | -0.01±0.02 | -0.01±0.04 | 0.230 |
| aVL(ST40)mV | 0±0.02     | -0.02±0.07 | 0.000 |
| aVF(ST40)mV | 0.01±0.03  | 0.03±0.09  | 0.000 |
| V1(ST40)mV  | 0.05±0.04  | 0.06±0.08  | 0.123 |
| V2(ST40)mV  | 0.12±0.08  | 0.14±0.16  | 0.025 |
| V3(ST40)mV  | 0.09±0.08  | 0.11±0.17  | 0.011 |
| V4(ST40)mV  | 0.05±0.06  | 0.06±0.14  | 0.172 |
| V5(ST40)mV  | 0.02±0.04  | 0.02±0.09  | 0.911 |
| V6(ST40)mV  | 0.01±0.03  | 0.01±0.06  | 0.889 |
| I (ST60)mV  | 0.02±0.03  | 0±0.05     | 0.000 |
| II(ST60)mV  | 0.02±0.03  | 0.04±0.08  | 0.000 |
| III(ST60)mV | 0±0.03     | 0.04±0.11  | 0.000 |
| aVR(ST60)mV | -0.02±0.03 | -0.02±0.04 | 0.783 |
| aVL(ST60)mV | 0.01±0.02  | -0.02±0.07 | 0.000 |
| aVF(ST60)mV | 0.01±0.03  | 0.04±0.09  | 0.000 |
| V1(ST60)mV  | 0.06±0.05  | 0.07±0.08  | 0.220 |
| V2(ST60)mV  | 0.16±0.1   | 0.18±0.18  | 0.050 |
| V3(ST60)mV  | 0.12±0.1   | 0.14±0.18  | 0.070 |
| V4(ST60)mV  | 0.07±0.07  | 0.08±0.15  | 0.933 |
| V5(ST60)mV  | 0.04±0.05  | 0.03±0.1   | 0.115 |
| V6(ST60)mV  | 0.02±0.04  | 0.01±0.07  | 0.146 |
| I (ST80)mV  | 0.03±0.03  | 0.01±0.06  | 0.000 |
| II(ST80)mV  | 0.04±0.04  | 0.05±0.09  | 0.004 |
| III(ST80)mV | 0±0.03     | 0.04±0.11  | 0.000 |

|             |            |            |       |
|-------------|------------|------------|-------|
| aVR(ST80)mV | -0.03±0.03 | -0.03±0.05 | 0.173 |
| aVL(ST80)mV | 0.01±0.02  | -0.02±0.08 | 0.000 |
| aVF(ST80)mV | 0.02±0.03  | 0.05±0.1   | 0.000 |
| V1(ST80)mV  | 0.07±0.07  | 0.08±0.09  | 0.183 |
| V2(ST80)mV  | 0.2±0.13   | 0.22±0.19  | 0.127 |
| V3(ST80)mV  | 0.17±0.13  | 0.17±0.19  | 0.541 |
| V4(ST80)mV  | 0.11±0.1   | 0.09±0.15  | 0.044 |
| V5(ST80)mV  | 0.07±0.07  | 0.04±0.11  | 0.000 |
| V6(ST80)mV  | 0.04±0.05  | 0.02±0.08  | 0.000 |

---

**Supplementary Table S4 ECG features between Cohort 1 and Cohort 2**

|                  | Cohort 1     | Cohort 2     | P value |
|------------------|--------------|--------------|---------|
| n                | 736          | 90           |         |
| Minimun HR       | 70.54±14.55  | 68.12±14.89  | 0.145   |
| Maxmum HR        | 82.12±23.01  | 79.15±19.08  | 0.250   |
| Average HR       | 75.43±14.97  | 72.73±13.52  | 0.110   |
| PR(ms)           | 152.83±28.45 | 147.1±30.64  | 0.081   |
| P wave(ms)       | 107.59±23.57 | 100.64±24.33 | 0.010   |
| QRS(ms)          | 103.79±12.44 | 104.34±8.57  | 0.690   |
| T wave(ms)       | 180.72±27.05 | 180.98±32.65 | 0.934   |
| QT interval(ms)  | 388.6±37.34  | 396.99±38.04 | 0.050   |
| QTc interval(ms) | 432.13±32.39 | 433.53±28.89 | 0.700   |
| QRS axis         | 39.32±51.92  | 26.63±47.66  | 0.031   |
| RV1+SV5 mv       | 0.54±0.36    | 0.51±0.33    | 0.407   |
| RV5+SV1 mv       | 2.1±0.83     | 2.05±0.83    | 0.607   |
| R-PB(ms)         | 199.86±37.58 | 196.44±34.44 | 0.421   |
| R-P(ms)          | 139.57±31.63 | 142.14±29.66 | 0.473   |
| R-PE(ms)         | 93.27±20.75  | 95.8±22.95   | 0.291   |
| R-Q(ms)          | 49.4±4.31    | 49.87±3.52   | 0.330   |
| R-S(ms)          | 54.39±9.86   | 54.47±6.39   | 0.942   |
| R-TB(ms)         | 158.49±28.31 | 166.14±26.2  | 0.017   |
| R-T(ms)          | 265.36±39.55 | 267.77±42.84 | 0.596   |
| R-TE(ms)         | 339.2±37.17  | 347.12±38.73 | 0.063   |
| Q-P(ms)          | 93.22±25.06  | 94.2±24.41   | 0.731   |
| S-T(ms)          | 210.97±40.37 | 213.3±42.9   | 0.615   |
| Q-PB(ms)         | 153.86±25.42 | 148.73±26.12 | 0.078   |
| S-TE(ms)         | 284.82±38.32 | 292.65±39.76 | 0.074   |
| I (PB)mV         | 0.06±0.03    | 0.06±0.03    | 0.841   |
| II(PB)mV         | 0.1±0.04     | 0.09±0.04    | 0.051   |
| III(PB)mV        | 0.07±0.04    | 0.06±0.04    | 0.036   |
| aVR(PB)mV        | 0±0          | 0±0          | 0.403   |
| aVL(PB)mV        | 0.03±0.02    | 0.03±0.03    | 0.339   |
| aVF(PB)mV        | 0.08±0.04    | 0.07±0.04    | 0.055   |
| V1(PB)mV         | 0.04±0.03    | 0.03±0.03    | 0.388   |
| V2(PB)mV         | 0.05±0.03    | 0.05±0.03    | 0.199   |
| V3(PB)mV         | 0.06±0.03    | 0.06±0.03    | 0.768   |
| V4(PB)mV         | 0.06±0.03    | 0.06±0.02    | 0.524   |
| V5(PB)mV         | 0.06±0.02    | 0.06±0.03    | 0.757   |
| V6(PB)mV         | 0.06±0.02    | 0.06±0.02    | 0.640   |
| I (PE)mV         | 0±0          | 0±0.01       | 0.445   |
| II(PE)mV         | 0±0.01       | 0±0          | 0.778   |
| III(PE)mV        | -0.01±0.02   | -0.01±0.02   | 0.245   |
| aVR(PE)mV        | -0.08±0.03   | -0.07±0.03   | 0.225   |
| aVL(PE)mV        | -0.02±0.02   | -0.02±0.02   | 0.439   |

|           |            |            |       |
|-----------|------------|------------|-------|
| aVF(PE)mV | 0±0.01     | 0±0.01     | 0.696 |
| V1(PE)mV  | -0.03±0.03 | -0.04±0.03 | 0.216 |
| V2(PE)mV  | -0.01±0.02 | -0.01±0.02 | 0.613 |
| V3(PE)mV  | 0±0.01     | 0±0.02     | 0.971 |
| V4(PE)mV  | 0±0.01     | 0±0.01     | 0.606 |
| V5(PE)mV  | 0±0.01     | 0±0.01     | 0.901 |
| V6(PE)mV  | 0±0.01     | 0±0.01     | 0.905 |
| I (Q)mV   | -0.03±0.07 | -0.02±0.03 | 0.230 |
| II(Q)mV   | -0.05±0.08 | -0.07±0.11 | 0.036 |
| III(Q)mV  | -0.13±0.23 | -0.22±0.29 | 0.005 |
| aVR(Q)mV  | -0.34±0.33 | -0.29±0.29 | 0.205 |
| aVL(Q)mV  | -0.04±0.09 | -0.03±0.06 | 0.228 |
| aVF(Q)mV  | -0.07±0.13 | -0.12±0.18 | 0.001 |
| V1(Q)mV   | -0.15±0.37 | -0.23±0.4  | 0.080 |
| V2(Q)mV   | -0.19±0.58 | -0.37±0.69 | 0.007 |
| V3(Q)mV   | -0.15±0.49 | -0.24±0.51 | 0.121 |
| V4(Q)mV   | -0.07±0.24 | -0.08±0.26 | 0.647 |
| V5(Q)mV   | -0.05±0.12 | -0.03±0.08 | 0.303 |
| V6(Q)mV   | -0.04±0.06 | -0.03±0.05 | 0.645 |
| I (R)mV   | 0.58±0.3   | 0.56±0.26  | 0.465 |
| II(R)mV   | 0.65±0.36  | 0.49±0.29  | 0.000 |
| III(R)mV  | 0.33±0.32  | 0.24±0.24  | 0.009 |
| aVR(R)mV  | 0.08±0.09  | 0.07±0.07  | 0.256 |
| aVL(R)mV  | 0.36±0.28  | 0.39±0.24  | 0.339 |
| aVF(R)mV  | 0.44±0.34  | 0.31±0.26  | 0.000 |
| V1(R)mV   | 0.2±0.21   | 0.15±0.18  | 0.014 |
| V2(R)mV   | 0.58±0.45  | 0.54±0.54  | 0.379 |
| V3(R)mV   | 0.89±0.64  | 0.8±0.74   | 0.221 |
| V4(R)mV   | 1.32±0.78  | 1.17±0.86  | 0.118 |
| V5(R)mV   | 1.29±0.69  | 1.29±0.7   | 0.908 |
| V6(R)mV   | 1.04±0.53  | 1.12±0.56  | 0.220 |
| I (S)mV   | -0.1±0.12  | -0.1±0.1   | 0.905 |
| II(S)mV   | -0.1±0.14  | -0.05±0.12 | 0.003 |
| III(S)mV  | -0.16±0.24 | -0.09±0.19 | 0.008 |
| aVR(S)mV  | -0.25±0.36 | -0.21±0.29 | 0.268 |
| aVL(S)mV  | -0.14±0.16 | -0.13±0.14 | 0.557 |
| aVF(S)mV  | -0.1±0.15  | -0.05±0.12 | 0.003 |
| V1(S)mV   | -0.82±0.42 | -0.77±0.48 | 0.362 |
| V2(S)mV   | -1.1±0.7   | -0.88±0.73 | 0.006 |
| V3(S)mV   | -0.82±0.62 | -0.78±0.65 | 0.583 |
| V4(S)mV   | -0.57±0.47 | -0.61±0.44 | 0.549 |
| V5(S)mV   | -0.34±0.3  | -0.37±0.27 | 0.512 |
| V6(S)mV   | -0.16±0.19 | -0.17±0.18 | 0.630 |
| I (R')mV  | 0±0.01     | 0±0        | 0.666 |

|           |            |            |       |
|-----------|------------|------------|-------|
| II(R')mV  | 0±0.02     | 0.01±0.03  | 0.405 |
| III(R')mV | 0.04±0.1   | 0.03±0.08  | 0.603 |
| aVR(R')mV | 0.02±0.06  | 0.01±0.04  | 0.161 |
| aVL(R')mV | 0.01±0.02  | 0±0.01     | 0.059 |
| aVF(R')mV | 0.02±0.06  | 0.01±0.05  | 0.577 |
| V1(R')mV  | 0.02±0.11  | 0±0.02     | 0.287 |
| V2(R')mV  | 0±0.02     | 0±0.01     | 0.683 |
| V3(R')mV  | 0±0.03     | 0.01±0.09  | 0.476 |
| V4(R')mV  | 0±0.04     | 0±0.02     | 0.843 |
| V5(R')mV  | 0±0.01     | 0±0        | 0.518 |
| V6(R')mV  | 0±0.01     | 0±0        | 0.571 |
| I (S')mV  | 0±0        | 0±0        | 0.732 |
| II(S')mV  | 0±0.01     | 0±0        | 0.629 |
| III(S')mV | -0.01±0.03 | 0±0        | 0.141 |
| aVR(S')mV | 0±0        | 0±0        | 0.732 |
| aVL(S')mV | 0±0.01     | 0±0        | 0.649 |
| aVF(S')mV | 0±0.04     | 0±0        | 0.264 |
| V1(S')mV  | 0±0.02     | 0±0.01     | 0.820 |
| V2(S')mV  | 0±0.08     | 0±0        | 0.605 |
| V3(S')mV  | 0±0.01     | -0.01±0.09 | 0.006 |
| V4(S')mV  | 0±0.04     | -0.01±0.06 | 0.432 |
| V5(S')mV  | 0±0        | 0±0        | 0.000 |
| V6(S')mV  | 0±0        | 0±0        | 0.732 |
| I (TB)mV  | 0.12±0.08  | 0.1±0.08   | 0.110 |
| II(TB)mV  | 0.14±0.09  | 0.09±0.08  | 0.000 |
| III(TB)mV | 0.06±0.08  | 0.05±0.08  | 0.192 |
| aVR(TB)mV | 0±0.02     | 0.01±0.02  | 0.003 |
| aVL(TB)mV | 0.06±0.07  | 0.09±0.1   | 0.011 |
| aVF(TB)mV | 0.09±0.08  | 0.06±0.08  | 0.001 |
| V1(TB)mV  | 0.07±0.09  | 0.07±0.11  | 0.917 |
| V2(TB)mV  | 0.31±0.23  | 0.3±0.29   | 0.636 |
| V3(TB)mV  | 0.28±0.23  | 0.26±0.26  | 0.459 |
| V4(TB)mV  | 0.25±0.21  | 0.2±0.21   | 0.039 |
| V5(TB)mV  | 0.2±0.16   | 0.15±0.16  | 0.006 |
| V6(TB)mV  | 0.16±0.12  | 0.12±0.13  | 0.006 |
| I (TE)mV  | 0.12±0.08  | 0.1±0.08   | 0.110 |
| II(TE)mV  | 0.14±0.09  | 0.09±0.08  | 0.000 |
| III(TE)mV | 0.06±0.08  | 0.05±0.08  | 0.192 |
| aVR(TE)mV | 0±0.02     | 0.01±0.02  | 0.058 |
| aVL(TE)mV | 0.06±0.07  | 0.09±0.1   | 0.039 |
| aVF(TE)mV | 0.09±0.08  | 0.06±0.08  | 0.001 |
| V1(TE)mV  | 0.07±0.09  | 0.07±0.11  | 0.917 |
| V2(TE)mV  | 0.31±0.23  | 0.3±0.29   | 0.636 |
| V3(TE)mV  | 0.28±0.23  | 0.26±0.26  | 0.459 |

|             |            |            |       |
|-------------|------------|------------|-------|
| V4(TE)mV    | 0.25±0.21  | 0.2±0.21   | 0.039 |
| V5(TE)mV    | 0.2±0.16   | 0.15±0.16  | 0.006 |
| V6(TE)mV    | 0.16±0.12  | 0.12±0.13  | 0.006 |
| I (ST20)mV  | 0±0.03     | -0.02±0.05 | 0.000 |
| II(ST20)mV  | 0.01±0.06  | 0.02±0.05  | 0.414 |
| III(ST20)mV | 0.01±0.07  | 0.03±0.08  | 0.027 |
| aVR(ST20)mV | -0.01±0.03 | 0±0.02     | 0.203 |
| aVL(ST20)mV | -0.01±0.04 | -0.02±0.06 | 0.004 |
| aVF(ST20)mV | 0.01±0.06  | 0.02±0.06  | 0.106 |
| V1(ST20)mV  | 0.04±0.05  | 0.05±0.1   | 0.166 |
| V2(ST20)mV  | 0.1±0.11   | 0.08±0.12  | 0.356 |
| V3(ST20)mV  | 0.07±0.11  | 0.06±0.12  | 0.691 |
| V4(ST20)mV  | 0.03±0.09  | 0.02±0.11  | 0.646 |
| V5(ST20)mV  | 0.01±0.06  | 0±0.07     | 0.910 |
| V6(ST20)mV  | 0±0.04     | -0.01±0.05 | 0.201 |
| I (ST40)mV  | 0.01±0.03  | -0.01±0.05 | 0.000 |
| II(ST40)mV  | 0.02±0.06  | 0.02±0.05  | 0.550 |
| III(ST40)mV | 0.01±0.07  | 0.03±0.09  | 0.036 |
| aVR(ST40)mV | -0.01±0.03 | -0.01±0.02 | 0.118 |
| aVL(ST40)mV | 0±0.04     | -0.02±0.06 | 0.005 |
| aVF(ST40)mV | 0.02±0.06  | 0.03±0.07  | 0.154 |
| V1(ST40)mV  | 0.06±0.06  | 0.06±0.06  | 0.439 |
| V2(ST40)mV  | 0.13±0.12  | 0.12±0.12  | 0.581 |
| V3(ST40)mV  | 0.1±0.12   | 0.1±0.13   | 0.911 |
| V4(ST40)mV  | 0.05±0.09  | 0.05±0.11  | 0.964 |
| V5(ST40)mV  | 0.02±0.06  | 0.02±0.08  | 0.691 |
| V6(ST40)mV  | 0.01±0.05  | 0±0.05     | 0.372 |
| I (ST60)mV  | 0.01±0.04  | 0±0.05     | 0.001 |
| II(ST60)mV  | 0.03±0.06  | 0.03±0.06  | 0.862 |
| III(ST60)mV | 0.02±0.07  | 0.03±0.1   | 0.065 |
| aVR(ST60)mV | -0.02±0.03 | -0.01±0.03 | 0.068 |
| aVL(ST60)mV | 0±0.05     | -0.02±0.07 | 0.015 |
| aVF(ST60)mV | 0.02±0.06  | 0.03±0.08  | 0.262 |
| V1(ST60)mV  | 0.06±0.07  | 0.07±0.06  | 0.593 |
| V2(ST60)mV  | 0.16±0.14  | 0.16±0.14  | 0.608 |
| V3(ST60)mV  | 0.13±0.13  | 0.13±0.15  | 0.811 |
| V4(ST60)mV  | 0.07±0.1   | 0.07±0.12  | 0.991 |
| V5(ST60)mV  | 0.03±0.07  | 0.04±0.09  | 0.584 |
| V6(ST60)mV  | 0.02±0.05  | 0.01±0.06  | 0.495 |
| I (ST80)mV  | 0.02±0.04  | 0.01±0.05  | 0.003 |
| II(ST80)mV  | 0.04±0.06  | 0.04±0.07  | 0.594 |
| III(ST80)mV | 0.02±0.07  | 0.03±0.11  | 0.192 |
| aVR(ST80)mV | -0.03±0.04 | -0.02±0.03 | 0.030 |
| aVL(ST80)mV | 0±0.05     | -0.01±0.08 | 0.038 |

|             |           |           |       |
|-------------|-----------|-----------|-------|
| aVF(ST80)mV | 0.03±0.06 | 0.03±0.08 | 0.633 |
| V1(ST80)mV  | 0.07±0.08 | 0.08±0.08 | 0.650 |
| V2(ST80)mV  | 0.21±0.16 | 0.21±0.16 | 0.706 |
| V3(ST80)mV  | 0.17±0.15 | 0.17±0.17 | 0.856 |
| V4(ST80)mV  | 0.11±0.12 | 0.1±0.14  | 0.841 |
| V5(ST80)mV  | 0.06±0.09 | 0.06±0.1  | 0.700 |
| V6(ST80)mV  | 0.03±0.06 | 0.03±0.07 | 0.521 |

---



**Supplementary Table S5 ECG features among different locations of infarct-related arteries.**

|            | Ctrl            | LAD             | RCA             | LCX             | P value |
|------------|-----------------|-----------------|-----------------|-----------------|---------|
| n          | 502             | 158             | 115             | 45              |         |
| Minimum HR | 151.71±12.62    | 151.37±17.54    | 155.27±16.83    | 153.22±16.98    | 0.107   |
| Maximum HR | 108.8±20.03     | 103.93±25.62    | 102.89±25.48    | 105.67±25.57    | 0.000   |
| Average HR | 102.72±12.52    | 106.99±17.32    | 105.71±17.81    | 100.6±17.3      | 0.000   |
| PR(ms)     | 151.71±24.459   | 151.37±34.446   | 155.27±34.281   | 153.22±35.158   | 0.649   |
| P 波(ms)    | 108.8±21.88     | 103.93±27.323   | 102.89±25.824   | 105.67±22.887   | 0.028   |
| QRS(ms)    | 102.72±10.689   | 106.99±12.464   | 105.71±16.883   | 100.6±7.608     | 0.000   |
| T 波(ms)    | 183.61±21.694   | 165.11±32.862   | 186.87±30.704   | 187.98±38.36    | 0.000   |
| QT(ms)     | 386.24±32.409   | 390.7±44.52     | 396.9±40.256    | 402.49±49.73    | 0.003   |
| QTc(ms)    | 423.81±26.269   | 443.87±37.137   | 447.42±32.807   | 447.31±37.289   | 0.000   |
| QRS axis   | 43.23±38.111    | 44.17±74.134    | 8.31±54.242     | 33.71±55.094    | 0.000   |
| RV1+SV5 mv | 0.57±0.33105    | 0.44±0.39471    | 0.52±0.37279    | 0.57±0.3195     | 0.000   |
| RV5+SV1 mv | 2.31±0.70923    | 1.56±0.83317    | 1.91±0.9146     | 2.05±0.88383    | 0.000   |
| R-PB(ms)   | 199.7±31.20219  | 198.33±45.1145  | 200.08±47.62484 | 199.96±40.01815 | 0.977   |
| R-P(ms)    | 136.46±24.42172 | 144.14±38.52577 | 148.21±41.88529 | 141.04±36.86397 | 0.001   |
| R-PE(ms)   | 91.59±15.21501  | 95.75±24.14887  | 98.73±30.88897  | 94.29±29.68135  | 0.004   |
| R-Q(ms)    | 49.39±3.97991   | 50.44±4.83674   | 49.01±4.15805   | 47.78±4.25809   | 0.001   |
| R-S(ms)    | 53.33±7.79457   | 56.55±9.85923   | 56.7±15.08861   | 52.82±4.86775   | 0.000   |
| R-TB(ms)   | 153.24±23.10517 | 175.15±30.32881 | 161.02±31.85906 | 166.73±37.51085 | 0.000   |
| R-T(ms)    | 264.23±39.57619 | 261.19±36.48089 | 275.35±43.89682 | 271.69±40.76754 | 0.015   |
| R-TE(ms)   | 336.85±32.03638 | 340.26±44.59873 | 347.89±40.92436 | 354.71±49.01791 | 0.001   |
| Q-P(ms)    | 88.42±20.13627  | 99.27±28.61393  | 105.13±30.33165 | 96.98±30.20949  | 0.000   |
| S-T(ms)    | 210.9±39.81739  | 204.64±37.73275 | 218.64±46.21141 | 218.87±41.03524 | 0.022   |
| Q-PB(ms)   | 151.81±24.34498 | 154.09±27.2386  | 157.68±27.40231 | 156.33±26.39301 | 0.118   |
| S-TE(ms)   | 283.52±32.76607 | 283.71±46.33144 | 291.18±43.6217  | 301.89±48.91097 | 0.006   |
| I (PB)mV   | 0.06±0.02626    | 0.06±0.02996    | 0.06±0.03002    | 0.07±0.02634    | 0.017   |
| II(PB)mV   | 0.11±0.04334    | 0.1±0.04573     | 0.09±0.04426    | 0.11±0.04057    | 0.002   |
| III(PB)mV  | 0.07±0.04248    | 0.06±0.04033    | 0.06±0.03361    | 0.07±0.03811    | 0.009   |
| aVR(PB)mV  | 0±0.00134       | 0±0.00318       | 0±0.00656       | 0±0             | 0.072   |
| aVL(PB)mV  | 0.02±0.02382    | 0.03±0.02801    | 0.02±0.02607    | 0.02±0.02483    | 0.011   |
| aVF(PB)mV  | 0.08±0.0428     | 0.08±0.04124    | 0.07±0.03815    | 0.09±0.03753    | 0.006   |
| V1(PB)mV   | 0.04±0.02649    | 0.04±0.0308     | 0.03±0.02836    | 0.04±0.02756    | 0.000   |
| V2(PB)mV   | 0.06±0.02789    | 0.05±0.04276    | 0.04±0.03397    | 0.06±0.03136    | 0.000   |
| V3(PB)mV   | 0.06±0.02538    | 0.06±0.03202    | 0.05±0.03037    | 0.06±0.02885    | 0.000   |
| V4(PB)mV   | 0.06±0.02363    | 0.06±0.0298     | 0.05±0.02727    | 0.06±0.03096    | 0.000   |
| V5(PB)mV   | 0.06±0.02251    | 0.06±0.02829    | 0.05±0.02629    | 0.06±0.02803    | 0.000   |
| V6(PB)mV   | 0.06±0.02214    | 0.05±0.02821    | 0.05±0.02686    | 0.06±0.02423    | 0.000   |
| I (PE)mV   | 0±0.00161       | 0±0.00636       | 0±0.00725       | 0±0             | 0.045   |
| II(PE)mV   | 0±0.00385       | 0±0.00554       | 0±0.01179       | 0±0             | 0.152   |
| III(PE)mV  | -0.01±0.01895   | -0.01±0.02404   | -0.01±0.02279   | -0.01±0.01792   | 0.027   |

|           |               |               |               |               |       |
|-----------|---------------|---------------|---------------|---------------|-------|
| aVR(PE)mV | -0.08±0.02702 | -0.08±0.03133 | -0.07±0.03279 | -0.08±0.02742 | 0.005 |
| aVL(PE)mV | -0.02±0.02301 | -0.02±0.02124 | -0.02±0.0192  | -0.02±0.02109 | 0.111 |
| aVF(PE)mV | 0±0.00668     | 0±0.00967     | 0±0.01327     | 0±0.00447     | 0.375 |
| V1(PE)mV  | -0.03±0.02887 | -0.04±0.03113 | -0.04±0.03219 | -0.05±0.03655 | 0.000 |
| V2(PE)mV  | -0.01±0.01611 | -0.01±0.02177 | -0.01±0.02516 | -0.01±0.01992 | 0.000 |
| V3(PE)mV  | 0±0.00802     | 0±0.01681     | -0.01±0.02157 | 0±0.01338     | 0.000 |
| V4(PE)mV  | 0±0.0059      | 0±0.01285     | 0±0.0146      | 0±0.01041     | 0.001 |
| V5(PE)mV  | 0±0.00507     | 0±0.01142     | 0±0.01122     | 0±0.00625     | 0.041 |
| V6(PE)mV  | 0±0.00381     | 0±0.00841     | 0±0.0056      | 0±0           | 0.208 |
| I (Q)mV   | -0.03±0.03208 | -0.03±0.05448 | -0.03±0.13977 | -0.03±0.04251 | 0.789 |
| II(Q)mV   | -0.03±0.03987 | -0.05±0.09288 | -0.14±0.13458 | -0.08±0.09537 | 0.000 |
| III(Q)mV  | -0.06±0.10919 | -0.12±0.21261 | -0.48±0.36453 | -0.2±0.21777  | 0.000 |
| aVR(Q)mV  | -0.38±0.34138 | -0.31±0.26821 | -0.22±0.27712 | -0.17±0.28435 | 0.000 |
| aVL(Q)mV  | -0.04±0.07001 | -0.06±0.09238 | -0.02±0.1404  | -0.04±0.04873 | 0.008 |
| aVF(Q)mV  | -0.03±0.06039 | -0.07±0.12418 | -0.26±0.21815 | -0.12±0.12985 | 0.000 |
| V1(Q)mV   | -0.04±0.20244 | -0.62±0.52689 | -0.09±0.25586 | -0.04±0.17309 | 0.000 |
| V2(Q)mV   | -0.01±0.13048 | -1±0.97785    | -0.03±0.18575 | -0.05±0.20961 | 0.000 |
| V3(Q)mV   | -0.01±0.14134 | -0.77±0.84845 | -0.02±0.07485 | -0.06±0.23337 | 0.000 |
| V4(Q)mV   | -0.01±0.06311 | -0.29±0.47648 | -0.02±0.06166 | -0.04±0.09264 | 0.000 |
| V5(Q)mV   | -0.02±0.04189 | -0.11±0.22106 | -0.05±0.10899 | -0.06±0.07475 | 0.000 |
| V6(Q)mV   | -0.03±0.03648 | -0.04±0.07754 | -0.05±0.07901 | -0.07±0.06629 | 0.000 |
| I (R)mV   | 0.61±0.27968  | 0.44±0.27271  | 0.66±0.34156  | 0.61±0.30686  | 0.000 |
| II(R)mV   | 0.77±0.3222   | 0.46±0.30409  | 0.36±0.28686  | 0.47±0.28119  | 0.000 |
| III(R)mV  | 0.37±0.32637  | 0.26±0.25519  | 0.25±0.30608  | 0.26±0.22748  | 0.000 |
| aVR(R)mV  | 0.07±0.08458  | 0.08±0.09813  | 0.09±0.11408  | 0.07±0.06471  | 0.402 |
| aVL(R)mV  | 0.33±0.25499  | 0.32±0.25475  | 0.57±0.32942  | 0.44±0.28063  | 0.000 |
| aVF(R)mV  | 0.52±0.33416  | 0.32±0.27229  | 0.24±0.27844  | 0.29±0.24121  | 0.000 |
| V1(R)mV   | 0.23±0.18451  | 0.07±0.21345  | 0.21±0.22782  | 0.29±0.23648  | 0.000 |
| V2(R)mV   | 0.66±0.34775  | 0.09±0.21447  | 0.81±0.57149  | 0.87±0.62555  | 0.000 |
| V3(R)mV   | 1.01±0.50292  | 0.18±0.38627  | 1.12±0.75047  | 1.35±0.84681  | 0.000 |
| V4(R)mV   | 1.52±0.60538  | 0.41±0.57515  | 1.48±0.90497  | 1.58±0.81401  | 0.000 |
| V5(R)mV   | 1.49±0.55904  | 0.66±0.59164  | 1.3±0.81119   | 1.28±0.61267  | 0.000 |
| V6(R)mV   | 1.2±0.45043   | 0.7±0.50384   | 0.91±0.62855  | 0.96±0.52454  | 0.000 |
| I (S)mV   | 183.61±0.11   | 165.11±0.11   | 186.87±0.15   | 187.98±0.13   | 0.341 |
| II(S)mV   | 386.24±0.13   | 390.7±0.15    | 396.9±0.13    | 402.49±0.12   | 0.220 |
| III(S)mV  | 423.81±0.24   | 443.87±0.26   | 447.42±0.16   | 447.31±0.29   | 0.000 |
| aVR(S)mV  | 43.23±0.39    | 44.17±0.21    | 8.31±0.29     | 33.71±0.31    | 0.000 |
| aVL(S)mV  | 0.57±0.16     | 0.44±0.14     | 0.52±0.18     | 0.57±0.16     | 0.005 |
| aVF(S)mV  | 2.31±0.15     | 1.56±0.18     | 1.91±0.1      | 2.05±0.14     | 0.000 |
| V1(S)mV   | 199.7±0.39    | 198.33±0.47   | 200.08±0.38   | 199.96±0.53   | 0.000 |
| V2(S)mV   | 136.46±0.6    | 144.14±0.93   | 148.21±0.57   | 141.04±0.68   | 0.000 |
| V3(S)mV   | 91.59±0.6     | 95.75±0.7     | 98.73±0.49    | 94.29±0.57    | 0.000 |
| V4(S)mV   | 49.39±0.47    | 50.44±0.5     | 49.01±0.41    | 47.78±0.39    | 0.032 |
| V5(S)mV   | 53.33±0.3     | 56.55±0.31    | 56.7±0.28     | 52.82±0.23    | 0.238 |

|           |             |             |             |             |       |
|-----------|-------------|-------------|-------------|-------------|-------|
| V6(S)mV   | 153.24±0.19 | 175.15±0.19 | 161.02±0.18 | 166.73±0.15 | 0.218 |
| I (R')mV  | 264.23±0    | 261.19±0    | 275.35±0.03 | 271.69±0    | 0.066 |
| II(R')mV  | 336.85±0.01 | 340.26±0.04 | 347.89±0.02 | 354.71±0.05 | 0.033 |
| III(R')mV | 88.42±0.11  | 99.27±0.08  | 105.13±0.03 | 96.98±0.05  | 0.000 |
| aVR(R')mV | 210.9±0.05  | 204.64±0.06 | 218.64±0.08 | 218.87±0.09 | 0.000 |
| aVL(R')mV | 151.81±0.02 | 154.09±0.02 | 157.68±0.02 | 156.33±0.01 | 0.216 |
| aVF(R')mV | 283.52±0.06 | 283.71±0.07 | 291.18±0.03 | 301.89±0.05 | 0.090 |
| V1(R')mV  | 0.06±0.13   | 0.06±0.05   | 0.06±0.05   | 0.07±0.09   | 0.447 |
| V2(R')mV  | 0.11±0.01   | 0.1±0       | 0.09±0.04   | 0.11±0.01   | 0.004 |
| V3(R')mV  | 0.07±0.03   | 0.06±0.07   | 0.06±0.01   | 0.07±0.06   | 0.717 |
| V4(R')mV  | 0±0.01      | 0±0.08      | 0±0         | 0±0.04      | 0.189 |
| V5(R')mV  | 0.02±0.01   | 0.03±0      | 0.02±0      | 0.02±0      | 0.521 |
| V6(R')mV  | 0.08±0      | 0.08±0.01   | 0.07±0      | 0.09±0      | 0.498 |
| I (S')mV  | 0.04±0      | 0.04±0      | 0.03±0      | 0.04±0      | 0.889 |
| II(S')mV  | 0.06±0      | 0.05±0.02   | 0.04±0      | 0.06±0      | 0.039 |
| III(S')mV | 0.06±0.04   | 0.06±0.04   | 0.05±0      | 0.06±0      | 0.178 |
| aVR(S')mV | 0.06±0      | 0.06±0      | 0.05±0      | 0.06±0      | 0.889 |
| aVL(S')mV | 0.06±0.01   | 0.06±0      | 0.05±0      | 0.06±0      | 0.826 |
| aVF(S')mV | 0.06±0.02   | 0.05±0.06   | 0.05±0      | 0.06±0      | 0.006 |
| V1(S')mV  | 0±0.02      | 0±0         | 0±0         | 0±0         | 0.430 |
| V2(S')mV  | 0±0.02      | 0±0         | 0±0.04      | 0±0.29      | 0.001 |
| V3(S')mV  | -0.01±0     | -0.01±0.07  | -0.01±0.01  | -0.01±0     | 0.307 |
| V4(S')mV  | -0.08±0.01  | -0.08±0.1   | -0.07±0.03  | -0.08±0     | 0.021 |
| V5(S')mV  | -0.02±0     | -0.02±0     | -0.02±0     | -0.02±0     | 0.000 |
| V6(S')mV  | 0±0         | 0±0.01      | 0±0         | 0±0         | 0.242 |
| I (TB)mV  | -0.03±0.07  | -0.04±0.07  | -0.04±0.08  | -0.05±0.08  | 0.000 |
| II(TB)mV  | -0.01±0.08  | -0.01±0.09  | -0.01±0.08  | -0.01±0.07  | 0.000 |
| III(TB)mV | 0±0.06      | 0±0.1       | -0.01±0.08  | 0±0.07      | 0.000 |
| aVR(TB)mV | 0±0.01      | 0±0.03      | 0±0.03      | 0±0.03      | 0.000 |
| aVL(TB)mV | 0±0.06      | 0±0.05      | 0±0.1       | 0±0.08      | 0.000 |
| aVF(TB)mV | 0±0.07      | 0±0.09      | 0±0.08      | 0±0.07      | 0.000 |
| V1(TB)mV  | -0.03±0.09  | -0.03±0.08  | -0.03±0.09  | -0.03±0.14  | 0.000 |
| V2(TB)mV  | -0.03±0.21  | -0.05±0.16  | -0.14±0.25  | -0.08±0.33  | 0.000 |
| V3(TB)mV  | -0.06±0.21  | -0.12±0.14  | -0.48±0.26  | -0.2±0.32   | 0.000 |
| V4(TB)mV  | -0.38±0.2   | -0.31±0.12  | -0.22±0.21  | -0.17±0.24  | 0.000 |
| V5(TB)mV  | -0.04±0.15  | -0.06±0.1   | -0.02±0.13  | -0.04±0.13  | 0.000 |
| V6(TB)mV  | -0.03±0.11  | -0.07±0.09  | -0.26±0.1   | -0.12±0.11  | 0.000 |
| I (TE)mV  | -0.04±0.07  | -0.62±0.07  | -0.09±0.08  | -0.04±0.08  | 0.000 |
| II(TE)mV  | -0.01±0.08  | -1±0.09     | -0.03±0.08  | -0.05±0.07  | 0.000 |
| III(TE)mV | -0.01±0.06  | -0.77±0.1   | -0.02±0.08  | -0.06±0.07  | 0.000 |
| aVR(TE)mV | -0.01±0.01  | -0.29±0.03  | -0.02±0.03  | -0.04±0.03  | 0.000 |
| aVL(TE)mV | -0.02±0.06  | -0.11±0.05  | -0.05±0.1   | -0.06±0.08  | 0.000 |
| aVF(TE)mV | -0.03±0.07  | -0.04±0.09  | -0.05±0.08  | -0.07±0.07  | 0.000 |
| V1(TE)mV  | 0.61±0.09   | 0.44±0.08   | 0.66±0.09   | 0.61±0.14   | 0.000 |

|             |            |            |            |            |       |
|-------------|------------|------------|------------|------------|-------|
| V2(TE)mV    | 0.77±0.21  | 0.46±0.16  | 0.36±0.25  | 0.47±0.33  | 0.000 |
| V3(TE)mV    | 0.37±0.21  | 0.26±0.14  | 0.25±0.26  | 0.26±0.32  | 0.000 |
| V4(TE)mV    | 0.07±0.2   | 0.08±0.12  | 0.09±0.21  | 0.07±0.24  | 0.000 |
| V5(TE)mV    | 0.33±0.15  | 0.32±0.1   | 0.57±0.13  | 0.44±0.13  | 0.000 |
| V6(TE)mV    | 0.52±0.11  | 0.32±0.09  | 0.24±0.1   | 0.29±0.11  | 0.000 |
| I (ST20)mV  | 0.23±0.02  | 0.07±0.04  | 0.21±0.04  | 0.29±0.05  | 0.000 |
| II(ST20)mV  | 0.66±0.03  | 0.09±0.05  | 0.81±0.11  | 0.87±0.06  | 0.000 |
| III(ST20)mV | 1.01±0.02  | 0.18±0.07  | 1.12±0.14  | 1.35±0.08  | 0.000 |
| aVR(ST20)mV | 1.52±0.02  | 0.41±0.03  | 1.48±0.04  | 1.58±0.04  | 0.030 |
| aVL(ST20)mV | 1.49±0.01  | 0.66±0.05  | 1.3±0.09   | 1.28±0.06  | 0.000 |
| aVF(ST20)mV | 1.2±0.02   | 0.7±0.06   | 0.91±0.12  | 0.96±0.06  | 0.000 |
| V1(ST20)mV  | 0±0.04     | 0±0.09     | 0±0.08     | 0±0.06     | 0.000 |
| V2(ST20)mV  | 0±0.07     | 0±0.14     | 0±0.09     | 0±0.14     | 0.000 |
| V3(ST20)mV  | 0±0.06     | 0±0.15     | 0±0.11     | 0±0.14     | 0.000 |
| V4(ST20)mV  | 0±0.05     | 0±0.13     | 0±0.09     | 0±0.12     | 0.000 |
| V5(ST20)mV  | 0±0.04     | 0±0.09     | 0±0.07     | 0±0.09     | 0.000 |
| V6(ST20)mV  | 0±0.03     | 0±0.06     | 0±0.05     | 0±0.08     | 0.002 |
| I (ST40)mV  | 0.01±0.02  | 0.01±0.04  | -0.02±0.05 | -0.01±0.05 | 0.000 |
| II(ST40)mV  | 0.01±0.03  | 0.01±0.06  | 0.06±0.11  | 0.03±0.06  | 0.000 |
| III(ST40)mV | 0±0.02     | 0±0.07     | 0.09±0.14  | 0.04±0.08  | 0.000 |
| aVR(ST40)mV | -0.01±0.02 | -0.01±0.03 | -0.02±0.04 | -0.01±0.04 | 0.088 |
| aVL(ST40)mV | 0±0.02     | 0±0.05     | -0.05±0.09 | -0.03±0.06 | 0.000 |
| aVF(ST40)mV | 0.01±0.03  | 0±0.06     | 0.07±0.12  | 0.04±0.06  | 0.000 |
| V1(ST40)mV  | 0.05±0.04  | 0.09±0.07  | 0.04±0.08  | 0.03±0.06  | 0.000 |
| V2(ST40)mV  | 0.12±0.08  | 0.24±0.15  | 0.05±0.11  | 0.06±0.15  | 0.000 |
| V3(ST40)mV  | 0.09±0.08  | 0.2±0.16   | 0.03±0.12  | 0.02±0.14  | 0.000 |
| V4(ST40)mV  | 0.05±0.06  | 0.12±0.13  | 0±0.09     | -0.02±0.12 | 0.000 |
| V5(ST40)mV  | 0.02±0.04  | 0.05±0.1   | -0.01±0.07 | -0.01±0.09 | 0.000 |
| V6(ST40)mV  | 0.01±0.03  | 0.02±0.06  | 0±0.05     | 0±0.08     | 0.015 |
| I (ST60)mV  | 0.02±0.03  | 0.01±0.05  | -0.02±0.05 | 0±0.05     | 0.000 |
| II(ST60)mV  | 0.02±0.03  | 0.02±0.06  | 0.07±0.11  | 0.04±0.06  | 0.000 |
| III(ST60)mV | 0±0.03     | 0±0.07     | 0.09±0.14  | 0.05±0.08  | 0.000 |
| aVR(ST60)mV | -0.02±0.03 | -0.02±0.04 | -0.02±0.05 | -0.02±0.04 | 0.288 |
| aVL(ST60)mV | 0.01±0.02  | 0.01±0.05  | -0.05±0.09 | -0.02±0.06 | 0.000 |
| aVF(ST60)mV | 0.01±0.03  | 0.01±0.06  | 0.08±0.12  | 0.04±0.06  | 0.000 |
| V1(ST60)mV  | 0.06±0.05  | 0.09±0.08  | 0.05±0.09  | 0.04±0.07  | 0.000 |
| V2(ST60)mV  | 0.16±0.1   | 0.26±0.17  | 0.09±0.13  | 0.1±0.17   | 0.000 |
| V3(ST60)mV  | 0.12±0.1   | 0.22±0.17  | 0.06±0.14  | 0.05±0.16  | 0.000 |
| V4(ST60)mV  | 0.07±0.07  | 0.14±0.15  | 0.02±0.11  | 0±0.14     | 0.000 |
| V5(ST60)mV  | 0.04±0.05  | 0.06±0.11  | 0±0.08     | 0±0.1      | 0.000 |
| V6(ST60)mV  | 0.02±0.04  | 0.02±0.07  | 0.01±0.06  | 0.01±0.08  | 0.016 |
| I (ST80)mV  | 0.03±0.03  | 0.02±0.05  | -0.01±0.06 | 0±0.06     | 0.000 |
| II(ST80)mV  | 0.04±0.04  | 0.03±0.06  | 0.08±0.12  | 0.05±0.07  | 0.000 |
| III(ST80)mV | 0±0.03     | 0.01±0.07  | 0.09±0.15  | 0.05±0.08  | 0.000 |

|             |            |            |            |            |       |
|-------------|------------|------------|------------|------------|-------|
| aVR(ST80)mV | -0.03±0.03 | -0.02±0.04 | -0.03±0.05 | -0.02±0.05 | 0.106 |
| aVL(ST80)mV | 0.01±0.02  | 0±0.05     | -0.05±0.1  | -0.02±0.06 | 0.000 |
| aVF(ST80)mV | 0.02±0.03  | 0.02±0.06  | 0.08±0.13  | 0.05±0.07  | 0.000 |
| V1(ST80)mV  | 0.07±0.07  | 0.1±0.09   | 0.06±0.1   | 0.05±0.08  | 0.000 |
| V2(ST80)mV  | 0.2±0.13   | 0.3±0.18   | 0.15±0.17  | 0.16±0.2   | 0.000 |
| V3(ST80)mV  | 0.17±0.13  | 0.24±0.19  | 0.11±0.16  | 0.09±0.18  | 0.000 |
| V4(ST80)mV  | 0.11±0.1   | 0.15±0.16  | 0.05±0.13  | 0.03±0.15  | 0.000 |
| V5(ST80)mV  | 0.07±0.07  | 0.07±0.12  | 0.02±0.09  | 0.01±0.11  | 0.000 |
| V6(ST80)mV  | 0.04±0.05  | 0.03±0.08  | 0.02±0.07  | 0.02±0.09  | 0.000 |

---

**Supplementary Table S6 ECG features among different datasets**

|                  | External validation |                |              |              |                |
|------------------|---------------------|----------------|--------------|--------------|----------------|
|                  | Training set        | Validation set | Testing set  | set          | <i>P</i> value |
| n                | 445                 | 144            | 145          | 86           |                |
| Maxmum HR        | 15.21±0.72          | 14.26±1.19     | 12.72±1.06   | 14.89±1.61   | 0.545          |
| Minimun HR       | 25.19±1.19          | 19.58±1.63     | 18.65±1.55   | 19.08±2.06   | 0.218          |
| Average HR       | 15.15±0.72          | 14.91±1.24     | 14.58±1.21   | 13.52±1.46   | 0.415          |
| PR(ms)           | 152.94±30.13        | 153.47±27.97   | 151.82±23.32 | 147.1±30.64  | 0.346          |
| P wave(ms)       | 107.87±25.32        | 107.95±22.08   | 106.39±19.12 | 100.64±24.33 | 0.069          |
| QRS complex(ms)  | 104.16±13.28        | 102.85±10.73   | 103.56±11.35 | 104.34±8.57  | 0.683          |
| T wave(ms)       | 180.75±28.05        | 180.23±26.38   | 181.08±24.65 | 180.98±32.65 | 0.994          |
| QT interval(ms)  | 388.51±38.9         | 388.47±35.58   | 389.03±34.26 | 396.99±38.04 | 0.276          |
| QTc interval(ms) | 432.38±32.95        | 430.49±30.2    | 433.01±32.9  | 433.53±28.89 | 0.882          |
| QRS axis         | 40.24±52.89         | 35.89±51.75    | 39.89±49.21  | 26.63±47.66  | 0.141          |
| RV1+SV5 mv       | 0.55±0.38           | 0.52±0.32      | 0.54±0.31    | 0.51±0.33    | 0.615          |
| RV5+SV1 mv       | 2.06±0.82           | 2.14±0.87      | 2.16±0.82    | 2.05±0.83    | 0.557          |
| R-PB(ms)         | 200.38±38.38        | 199.38±38.69   | 198.76±34.02 | 196.44±34.44 | 0.830          |
| R-P(ms)          | 139.71±32.08        | 139.2±33.46    | 139.5±28.4   | 142.14±29.66 | 0.909          |
| R-PE(ms)         | 93.42±20.39         | 92.54±22.66    | 93.54±19.98  | 95.8±22.95   | 0.721          |
| R-Q(ms)          | 49.51±4.45          | 48.94±3.81     | 49.54±4.34   | 49.87±3.52   | 0.385          |
| R-S(ms)          | 54.66±10.71         | 53.91±8.84     | 54.02±7.94   | 54.47±6.39   | 0.817          |
| R-TB(ms)         | 158.25±29.08        | 159.3±28.02    | 158.41±26.32 | 166.14±26.2  | 0.120          |
| R-T(ms)          | 264.53±40.06        | 266.13±41.54   | 267.12±36    | 267.77±42.84 | 0.848          |
| R-TE(ms)         | 339±38.66           | 339.53±35.6    | 339.5±34.12  | 347.12±38.73 | 0.324          |
| Q-P(ms)          | 93.3±25.46          | 93.86±26.64    | 92.33±22.16  | 94.2±24.41   | 0.940          |
| S-T(ms)          | 209.87±40.85        | 212.22±42.25   | 213.1±36.96  | 213.3±42.9   | 0.775          |
| Q-PB(ms)         | 154.33±26.28        | 154.44±24.85   | 151.86±23.24 | 148.73±26.12 | 0.239          |
| S-TE(ms)         | 284.34±39.48        | 285.62±36.98   | 285.48±36.18 | 292.65±39.76 | 0.340          |
| I (PB)(mV)       | 0.06±0.03           | 0.06±0.03      | 0.06±0.03    | 0.06±0.03    | 0.458          |
| II(PB)mV         | 0.1±0.04            | 0.11±0.05      | 0.1±0.04     | 0.09±0.04    | 0.249          |
| III(PB)mV        | 0.07±0.04           | 0.07±0.04      | 0.07±0.04    | 0.06±0.04    | 0.188          |
| aVR(PB)mV        | 0±0                 | 0±0            | 0±0          | 0±0          | 0.650          |
| aVL(PB)mV        | 0.02±0.02           | 0.03±0.02      | 0.03±0.03    | 0.03±0.03    | 0.390          |
| aVF(PB)mV        | 0.08±0.04           | 0.08±0.04      | 0.08±0.04    | 0.07±0.04    | 0.248          |
| V1(PB)mV         | 0.04±0.03           | 0.04±0.03      | 0.04±0.03    | 0.03±0.03    | 0.134          |
| V2(PB)mV         | 0.05±0.03           | 0.06±0.03      | 0.05±0.03    | 0.05±0.03    | 0.338          |
| V3(PB)mV         | 0.06±0.03           | 0.06±0.03      | 0.06±0.03    | 0.06±0.03    | 0.299          |
| V4(PB)mV         | 0.06±0.03           | 0.06±0.03      | 0.06±0.03    | 0.06±0.02    | 0.374          |
| V5(PB)mV         | 0.06±0.02           | 0.06±0.03      | 0.06±0.02    | 0.06±0.03    | 0.130          |
| V6(PB)mV         | 0.05±0.02           | 0.06±0.03      | 0.06±0.02    | 0.06±0.02    | 0.441          |
| I (PE)mV         | 0±0                 | 0±0            | 0±0.01       | 0±0.01       | 0.572          |
| II(PE)mV         | 0±0.01              | 0±0            | 0±0.01       | 0±0          | 0.489          |
| III(PE)mV        | -0.01±0.02          | -0.01±0.02     | -0.01±0.02   | -0.01±0.02   | 0.307          |

|           |            |            |            |            |       |
|-----------|------------|------------|------------|------------|-------|
| aVR(PE)mV | -0.07±0.03 | -0.08±0.03 | -0.08±0.03 | -0.07±0.03 | 0.459 |
| aVL(PE)mV | -0.02±0.02 | -0.02±0.02 | -0.02±0.02 | -0.02±0.02 | 0.630 |
| aVF(PE)mV | 0±0.01     | 0±0.01     | 0±0.01     | 0±0.01     | 0.980 |
| V1(PE)mV  | -0.03±0.03 | -0.03±0.03 | -0.04±0.03 | -0.04±0.03 | 0.050 |
| V2(PE)mV  | -0.01±0.02 | -0.01±0.01 | -0.01±0.02 | -0.01±0.02 | 0.325 |
| V3(PE)mV  | 0±0.01     | 0±0.01     | 0±0.01     | 0±0.02     | 0.457 |
| V4(PE)mV  | 0±0.01     | 0±0.01     | 0±0        | 0±0.01     | 0.093 |
| V5(PE)mV  | 0±0.01     | 0±0.01     | 0±0        | 0±0.01     | 0.125 |
| V6(PE)mV  | 0±0.01     | 0±0        | 0±0        | 0±0.01     | 0.656 |
| I (Q)mV   | -0.03±0.05 | -0.03±0.03 | -0.04±0.11 | -0.02±0.03 | 0.361 |
| II(Q)mV   | -0.05±0.08 | -0.05±0.08 | -0.05±0.07 | -0.07±0.11 | 0.053 |
| III(Q)mV  | -0.13±0.24 | -0.12±0.21 | -0.12±0.23 | -0.22±0.29 | 0.007 |
| aVR(Q)mV  | -0.33±0.32 | -0.38±0.34 | -0.34±0.34 | -0.29±0.29 | 0.200 |
| aVL(Q)mV  | -0.05±0.09 | -0.04±0.06 | -0.04±0.1  | -0.03±0.06 | 0.569 |
| aVF(Q)mV  | -0.07±0.13 | -0.06±0.12 | -0.08±0.13 | -0.12±0.18 | 0.006 |
| V1(Q)mV   | -0.16±0.38 | -0.16±0.36 | -0.12±0.33 | -0.23±0.4  | 0.176 |
| V2(Q)mV   | -0.19±0.55 | -0.18±0.58 | -0.21±0.65 | -0.37±0.69 | 0.057 |
| V3(Q)mV   | -0.15±0.46 | -0.16±0.53 | -0.17±0.54 | -0.24±0.51 | 0.452 |
| V4(Q)mV   | -0.07±0.23 | -0.07±0.27 | -0.06±0.23 | -0.08±0.26 | 0.937 |
| V5(Q)mV   | -0.05±0.12 | -0.05±0.14 | -0.04±0.09 | -0.03±0.08 | 0.557 |
| V6(Q)mV   | -0.04±0.06 | -0.03±0.05 | -0.04±0.06 | -0.03±0.05 | 0.478 |
| I (R)mV   | 0.57±0.3   | 0.61±0.3   | 0.61±0.32  | 0.56±0.26  | 0.230 |
| II(R)mV   | 0.65±0.35  | 0.68±0.38  | 0.66±0.36  | 0.49±0.29  | 0.001 |
| III(R)mV  | 0.34±0.31  | 0.32±0.32  | 0.33±0.32  | 0.24±0.24  | 0.069 |
| aVR(R)mV  | 0.08±0.09  | 0.08±0.09  | 0.08±0.1   | 0.07±0.07  | 0.671 |
| aVL(R)mV  | 0.35±0.28  | 0.38±0.28  | 0.38±0.3   | 0.39±0.24  | 0.447 |
| aVF(R)mV  | 0.44±0.33  | 0.45±0.35  | 0.43±0.34  | 0.31±0.26  | 0.005 |
| V1(R)mV   | 0.2±0.21   | 0.22±0.22  | 0.2±0.22   | 0.15±0.18  | 0.078 |
| V2(R)mV   | 0.58±0.45  | 0.59±0.46  | 0.58±0.43  | 0.54±0.54  | 0.841 |
| V3(R)mV   | 0.89±0.64  | 0.88±0.69  | 0.92±0.58  | 0.8±0.74   | 0.606 |
| V4(R)mV   | 1.31±0.79  | 1.31±0.85  | 1.32±0.7   | 1.17±0.86  | 0.486 |
| V5(R)mV   | 1.29±0.69  | 1.27±0.72  | 1.33±0.64  | 1.29±0.7   | 0.893 |
| V6(R)mV   | 1.03±0.53  | 1.02±0.53  | 1.1±0.54   | 1.12±0.56  | 0.312 |
| I (S)mV   | 0.13±0.01  | 0.11±0.01  | 0.12±0.01  | 0.1±0.01   | 0.395 |
| II(S)mV   | 0.13±0.01  | 0.15±0.01  | 0.14±0.01  | 0.12±0.01  | 0.028 |
| III(S)mV  | 0.23±0.01  | 0.26±0.02  | 0.26±0.02  | 0.19±0.02  | 0.023 |
| aVR(S)mV  | 0.35±0.02  | 0.36±0.03  | 0.37±0.03  | 0.29±0.03  | 0.625 |
| aVL(S)mV  | 0.17±0.01  | 0.15±0.01  | 0.17±0.01  | 0.14±0.01  | 0.753 |
| aVF(S)mV  | 0.14±0.01  | 0.17±0.01  | 0.16±0.01  | 0.12±0.01  | 0.023 |
| V1(S)mV   | 0.4±0.02   | 0.43±0.04  | 0.45±0.04  | 0.48±0.05  | 0.080 |
| V2(S)mV   | 0.73±0.03  | 0.63±0.05  | 0.68±0.06  | 0.73±0.08  | 0.052 |
| V3(S)mV   | 0.66±0.03  | 0.5±0.04   | 0.62±0.05  | 0.65±0.07  | 0.525 |
| V4(S)mV   | 0.5±0.02   | 0.39±0.03  | 0.45±0.04  | 0.44±0.05  | 0.117 |
| V5(S)mV   | 0.32±0.01  | 0.28±0.02  | 0.29±0.02  | 0.27±0.03  | 0.293 |

|           |           |           |           |           |       |
|-----------|-----------|-----------|-----------|-----------|-------|
| V6(S)mV   | 0.2±0.01  | 0.18±0.01 | 0.19±0.02 | 0.18±0.02 | 0.275 |
| I (R')mV  | 0.02±0    | 0±0       | 0±0       | 0±0       | 0.719 |
| II(R')mV  | 0.02±0    | 0.03±0    | 0.01±0    | 0.03±0    | 0.736 |
| III(R')mV | 0.1±0     | 0.11±0.01 | 0.1±0.01  | 0.08±0.01 | 0.873 |
| aVR(R')mV | 0.07±0    | 0.04±0    | 0.05±0    | 0.04±0    | 0.010 |
| aVL(R')mV | 0.03±0    | 0.01±0    | 0.02±0    | 0.01±0    | 0.089 |
| aVF(R')mV | 0.05±0    | 0.06±0.01 | 0.08±0.01 | 0.05±0.01 | 0.486 |
| V1(R')mV  | 0.13±0.01 | 0.05±0    | 0.09±0.01 | 0.02±0    | 0.430 |
| V2(R')mV  | 0.02±0    | 0.01±0    | 0.02±0    | 0.01±0    | 0.774 |
| V3(R')mV  | 0.04±0    | 0.02±0    | 0±0       | 0.09±0.01 | 0.358 |
| V4(R')mV  | 0.05±0    | 0.02±0    | 0.01±0    | 0.02±0    | 0.790 |
| V5(R')mV  | 0.01±0    | 0±0       | 0.02±0    | 0±0       | 0.065 |
| V6(R')mV  | 0.01±0    | 0±0       | 0±0       | 0±0       | 0.774 |
| I (S')mV  | 0±0       | 0±0       | 0±0       | 0±0       | 0.840 |
| II(S')mV  | 0.01±0    | 0±0       | 0±0       | 0±0       | 0.642 |
| III(S')mV | 0.03±0    | 0.03±0    | 0.04±0    | 0±0       | 0.406 |
| aVR(S')mV | 0±0       | 0±0       | 0±0       | 0±0       | 0.840 |
| aVL(S')mV | 0.01±0    | 0±0       | 0±0       | 0±0       | 0.685 |
| aVF(S')mV | 0.03±0    | 0.06±0    | 0.01±0    | 0±0       | 0.264 |
| V1(S')mV  | 0.01±0    | 0.01±0    | 0.04±0    | 0.01±0    | 0.448 |
| V2(S')mV  | 0.02±0    | 0±0       | 0.16±0.01 | 0±0       | 0.150 |
| V3(S')mV  | 0.01±0    | 0±0       | 0±0       | 0.09±0.01 | 0.053 |
| V4(S')mV  | 0.06±0    | 0±0       | 0±0       | 0.06±0.01 | 0.544 |
| V5(S')mV  | 0±0       | 0±0       | 0±0       | 0±0       | .     |
| V6(S')mV  | 0±0       | 0±0       | 0±0       | 0±0       | 0.840 |
| I (TB)mV  | 0.08±0    | 0.08±0.01 | 0.08±0.01 | 0.08±0.01 | 0.262 |
| II(TB)mV  | 0.1±0     | 0.09±0.01 | 0.09±0.01 | 0.08±0.01 | 0.000 |
| III(TB)mV | 0.08±0    | 0.08±0.01 | 0.08±0.01 | 0.08±0.01 | 0.225 |
| aVR(TB)mV | 0.02±0    | 0.02±0    | 0.03±0    | 0.02±0    | 0.086 |
| aVL(TB)mV | 0.07±0    | 0.08±0.01 | 0.07±0.01 | 0.1±0.01  | 0.041 |
| aVF(TB)mV | 0.08±0    | 0.08±0.01 | 0.08±0.01 | 0.08±0.01 | 0.004 |
| V1(TB)mV  | 0.09±0    | 0.1±0.01  | 0.1±0.01  | 0.11±0.01 | 0.849 |
| V2(TB)mV  | 0.22±0.01 | 0.25±0.02 | 0.22±0.02 | 0.29±0.03 | 0.711 |
| V3(TB)mV  | 0.23±0.01 | 0.25±0.02 | 0.22±0.02 | 0.26±0.03 | 0.856 |
| V4(TB)mV  | 0.21±0.01 | 0.22±0.02 | 0.2±0.02  | 0.21±0.02 | 0.139 |
| V5(TB)mV  | 0.16±0.01 | 0.16±0.01 | 0.15±0.01 | 0.16±0.02 | 0.042 |
| V6(TB)mV  | 0.13±0.01 | 0.12±0.01 | 0.12±0.01 | 0.13±0.01 | 0.030 |
| I (TE)mV  | 0.08±0    | 0.08±0.01 | 0.08±0.01 | 0.08±0.01 | 0.262 |
| II(TE)mV  | 0.1±0     | 0.09±0.01 | 0.09±0.01 | 0.08±0.01 | 0.000 |
| III(TE)mV | 0.08±0    | 0.08±0.01 | 0.08±0.01 | 0.08±0.01 | 0.225 |
| aVR(TE)mV | 0.02±0    | 0.02±0    | 0.03±0    | 0.02±0    | 0.086 |
| aVL(TE)mV | 0.07±0    | 0.08±0.01 | 0.07±0.01 | 0.1±0.01  | 0.041 |
| aVF(TE)mV | 0.08±0    | 0.08±0.01 | 0.08±0.01 | 0.08±0.01 | 0.004 |
| V1(TE)mV  | 0.09±0    | 0.1±0.01  | 0.1±0.01  | 0.11±0.01 | 0.849 |



|             |            |            |            |            |       |
|-------------|------------|------------|------------|------------|-------|
| V2(TE)mV    | 0.22±0.01  | 0.25±0.02  | 0.22±0.02  | 0.29±0.03  | 0.711 |
| V3(TE)mV    | 0.23±0.01  | 0.25±0.02  | 0.22±0.02  | 0.26±0.03  | 0.856 |
| V4(TE)mV    | 0.21±0.01  | 0.22±0.02  | 0.2±0.02   | 0.21±0.02  | 0.139 |
| V5(TE)mV    | 0.16±0.01  | 0.16±0.01  | 0.15±0.01  | 0.16±0.02  | 0.042 |
| V6(TE)mV    | 0.13±0.01  | 0.12±0.01  | 0.12±0.01  | 0.13±0.01  | 0.030 |
| I (ST20)mV  | 0.03±0     | 0.03±0     | 0.03±0     | 0.05±0.01  | 0.003 |
| II(ST20)mV  | 0.04±0     | 0.1±0.01   | 0.04±0     | 0.05±0.01  | 0.183 |
| III(ST20)mV | 0.05±0     | 0.12±0.01  | 0.05±0     | 0.08±0.01  | 0.026 |
| aVR(ST20)mV | 0.03±0     | 0.04±0     | 0.03±0     | 0.02±0     | 0.272 |
| aVL(ST20)mV | 0.04±0     | 0.07±0.01  | 0.03±0     | 0.06±0.01  | 0.006 |
| aVF(ST20)mV | 0.05±0     | 0.11±0.01  | 0.04±0     | 0.06±0.01  | 0.054 |
| V1(ST20)mV  | 0.05±0     | 0.08±0.01  | 0.04±0     | 0.1±0.01   | 0.461 |
| V2(ST20)mV  | 0.11±0.01  | 0.11±0.01  | 0.1±0.01   | 0.12±0.01  | 0.833 |
| V3(ST20)mV  | 0.11±0.01  | 0.13±0.01  | 0.1±0.01   | 0.12±0.01  | 0.954 |
| V4(ST20)mV  | 0.08±0     | 0.09±0.01  | 0.09±0.01  | 0.11±0.01  | 0.536 |
| V5(ST20)mV  | 0.06±0     | 0.07±0.01  | 0.06±0     | 0.07±0.01  | 0.625 |
| V6(ST20)mV  | 0.04±0     | 0.05±0     | 0.04±0     | 0.05±0.01  | 0.394 |
| I (ST40)mV  | 0.01±0.03  | 0±0.04     | 0.01±0.03  | -0.01±0.05 | 0.002 |
| II(ST40)mV  | 0.02±0.04  | 0.03±0.09  | 0.02±0.04  | 0.02±0.05  | 0.241 |
| III(ST40)mV | 0.01±0.05  | 0.02±0.11  | 0.02±0.05  | 0.03±0.09  | 0.020 |
| aVR(ST40)mV | -0.01±0.03 | -0.01±0.04 | -0.01±0.03 | -0.01±0.02 | 0.362 |
| aVL(ST40)mV | 0±0.04     | -0.01±0.07 | -0.01±0.03 | -0.02±0.06 | 0.005 |
| aVF(ST40)mV | 0.01±0.05  | 0.02±0.1   | 0.02±0.04  | 0.03±0.07  | 0.083 |
| V1(ST40)mV  | 0.06±0.06  | 0.06±0.08  | 0.05±0.05  | 0.06±0.06  | 0.633 |
| V2(ST40)mV  | 0.13±0.12  | 0.13±0.13  | 0.13±0.11  | 0.12±0.12  | 0.945 |
| V3(ST40)mV  | 0.1±0.12   | 0.09±0.13  | 0.1±0.11   | 0.1±0.13   | 0.897 |
| V4(ST40)mV  | 0.05±0.09  | 0.04±0.1   | 0.06±0.09  | 0.05±0.11  | 0.344 |
| V5(ST40)mV  | 0.02±0.06  | 0.01±0.08  | 0.02±0.06  | 0.02±0.08  | 0.528 |
| V6(ST40)mV  | 0.01±0.04  | 0±0.05     | 0.01±0.05  | 0±0.05     | 0.561 |
| I (ST60)mV  | 0.01±0.04  | 0.01±0.04  | 0.01±0.03  | 0±0.05     | 0.004 |
| II(ST60)mV  | 0.03±0.05  | 0.04±0.09  | 0.03±0.04  | 0.03±0.06  | 0.354 |
| III(ST60)mV | 0.01±0.05  | 0.03±0.12  | 0.02±0.05  | 0.03±0.1   | 0.039 |
| aVR(ST60)mV | -0.02±0.03 | -0.02±0.04 | -0.02±0.03 | -0.01±0.03 | 0.279 |
| aVL(ST60)mV | 0±0.04     | -0.01±0.07 | 0±0.03     | -0.02±0.07 | 0.011 |
| aVF(ST60)mV | 0.02±0.05  | 0.03±0.1   | 0.02±0.04  | 0.03±0.08  | 0.160 |
| V1(ST60)mV  | 0.06±0.07  | 0.07±0.08  | 0.06±0.06  | 0.07±0.06  | 0.658 |
| V2(ST60)mV  | 0.16±0.14  | 0.16±0.15  | 0.17±0.13  | 0.16±0.14  | 0.943 |
| V3(ST60)mV  | 0.13±0.13  | 0.12±0.15  | 0.13±0.12  | 0.13±0.15  | 0.775 |
| V4(ST60)mV  | 0.08±0.1   | 0.06±0.11  | 0.08±0.1   | 0.07±0.12  | 0.269 |
| V5(ST60)mV  | 0.04±0.07  | 0.03±0.09  | 0.04±0.07  | 0.04±0.09  | 0.561 |
| V6(ST60)mV  | 0.02±0.05  | 0.01±0.06  | 0.02±0.06  | 0.01±0.06  | 0.594 |
| I (ST80)mV  | 0.02±0.04  | 0.02±0.05  | 0.02±0.04  | 0.01±0.05  | 0.008 |
| II(ST80)mV  | 0.04±0.05  | 0.05±0.1   | 0.04±0.05  | 0.04±0.07  | 0.366 |
| III(ST80)mV | 0.01±0.06  | 0.03±0.12  | 0.02±0.05  | 0.03±0.11  | 0.083 |

|             |            |            |            |            |       |
|-------------|------------|------------|------------|------------|-------|
| aVR(ST80)mV | -0.03±0.04 | -0.03±0.05 | -0.03±0.04 | -0.02±0.03 | 0.166 |
| aVL(ST80)mV | 0±0.04     | -0.01±0.07 | 0±0.04     | -0.01±0.08 | 0.029 |
| aVF(ST80)mV | 0.03±0.05  | 0.04±0.11  | 0.03±0.05  | 0.03±0.08  | 0.191 |
| V1(ST80)mV  | 0.07±0.08  | 0.08±0.09  | 0.07±0.07  | 0.08±0.08  | 0.735 |
| V2(ST80)mV  | 0.21±0.16  | 0.21±0.17  | 0.22±0.15  | 0.21±0.16  | 0.946 |
| V3(ST80)mV  | 0.17±0.15  | 0.15±0.16  | 0.17±0.14  | 0.17±0.17  | 0.650 |
| V4(ST80)mV  | 0.11±0.12  | 0.09±0.13  | 0.11±0.11  | 0.1±0.14   | 0.174 |
| V5(ST80)mV  | 0.06±0.08  | 0.05±0.1   | 0.06±0.08  | 0.06±0.1   | 0.595 |
| V6(ST80)mV  | 0.03±0.06  | 0.03±0.06  | 0.03±0.07  | 0.03±0.07  | 0.694 |

**Supplementary Table S7 The Sample Size and the Performance of Model 1 in Patients with Abnormal ECG Phenomenon.**

| Sample Size        |             |       |               |
|--------------------|-------------|-------|---------------|
| Total              | 82          |       |               |
| Train              | 53          |       |               |
| Val                | 16          |       |               |
| Test 1             | 9           |       |               |
| Test 2             | 4           |       |               |
|                    |             |       |               |
| Normal             | 44          |       |               |
| STEMI              | 38          |       |               |
| LAD                | 18          |       |               |
| RCA/LCX            | 20          |       |               |
|                    |             |       |               |
| Model 1            |             |       |               |
| Val+Test 1+ Test 2 |             |       | 29            |
|                    | Sensitivity | 0.895 | (34/38)       |
|                    | Specificity | 0.864 | (38/44)       |
|                    | PPV         | 0.905 | (38/42)       |
|                    | NPV         | 0.850 | (34/40)       |
|                    | AUC         | 0.879 | (0.797-0.961) |
